# Supplementary material
Source: publisher figshare collection journal article supplement (https://acs.figshare.com/ndownloader/files/22055595)
Supplement: Supplementary file 1 [file 22055595]

## Supplementary Information

### N-doped Hierarchical Mesoporous Carbon from Mesophase Pitch and Polypyrrole for Supercapacitors

Mengxuan Liu, Wei Li\*, Siying Ruan, and Youqing Fei

College of Materials Science and Engineering, Hunan University, Changsha, Hunan 410082, China.

#### Preparation of silica MCM-48

Typically, 13.4 g of cetyltrimethyl ammonium bromide (CTAB) was dispersed into a solution containing 15.2 ml of sodium hydroxide (2 M) and 79.2 ml of deionized water under magnetic stirring for 0.5 h at room temperature. Then, 14.2 g of tetraethoxysilane (TEOS) was dropped into the above solution. After continuously stirring for 0.5 h, the mixture was put into Teflon container and synthesized by hydrothermal reaction at 100°C for 72 h. Then, the obtained product was washed to neutral using deionized water for several times and dried in vacuum at 80°C for 24 h. Finally, the white powder after grinding was annealed in air atmosphere at 550°C for 6 h with a heating rate of 1.5°C/min and then the silica MCM-48 was obtained.

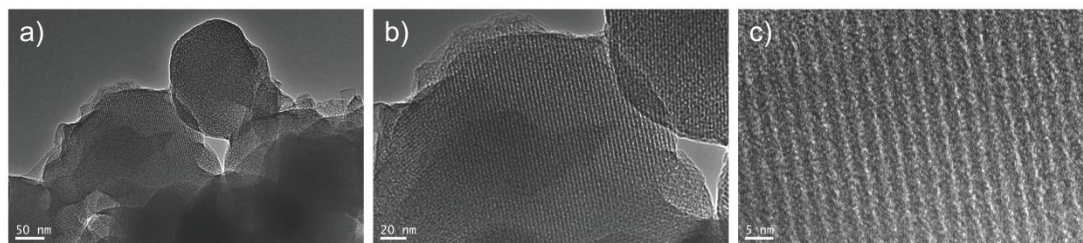

**Figure S1.** TEM of the MCM-48 sample: a) low-resolution TEM image; b) and c) high-resolution TEM images.

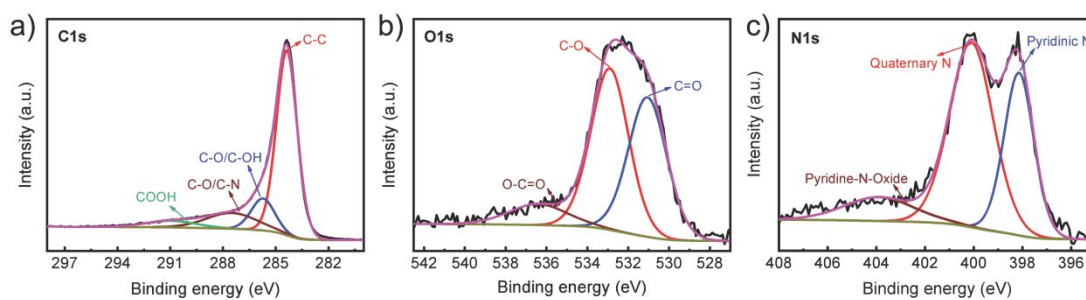

**Figure S2.** a) High resolution  $C_{1s}$  spectra; b) High resolution  $O_{1s}$  spectra; and c) High resolution  $N_{1s}$  spectra of NPC-600.

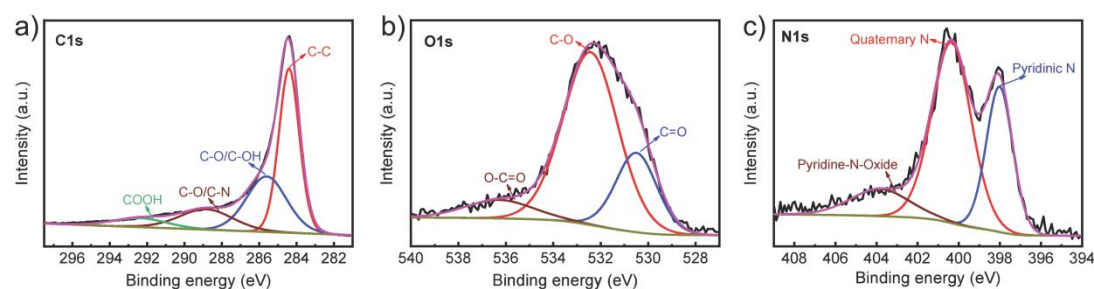

**Figure S3.** a) High resolution  $C_{1s}$  spectra; b) High resolution  $O_{1s}$  spectra; and c) high resolution  $N_{1s}$  spectra of NPC-800.

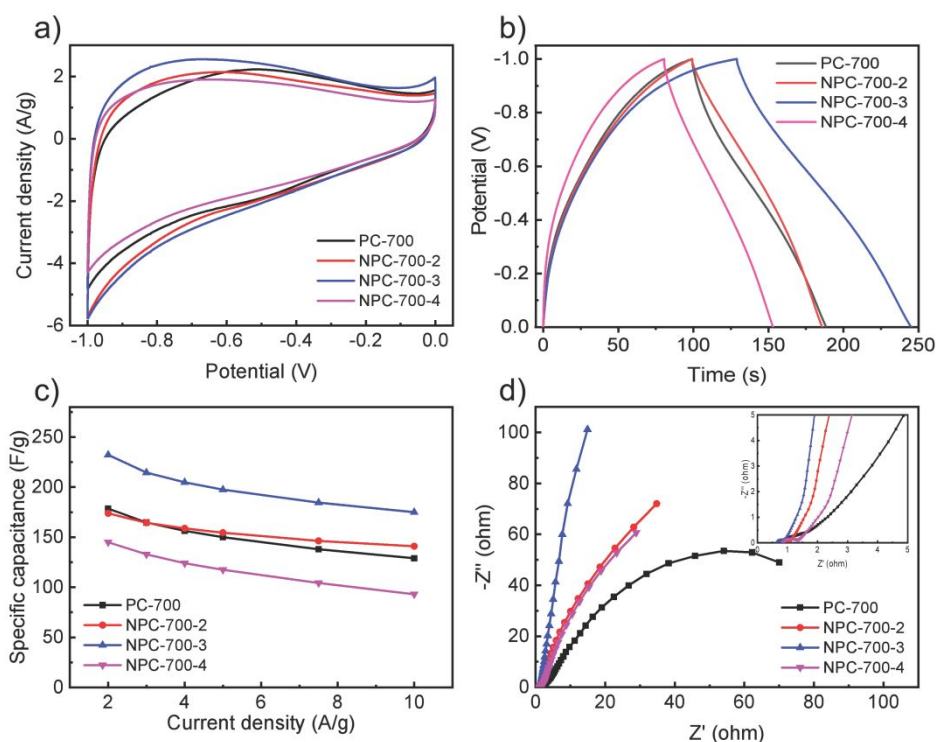

**Figure S4.** Comparison of electrochemical performance base on PC-700, NPC-700-2, NPC-700-3, NPC-700-4 (PC-700 is the sample without adding pyrrole; 2, 3 and 4 are the mass ratios of pyrrole and MP): a) CV curves at a scan rate of  $10 \text{ mV s}^{-1}$ ; b) GCD curves at current density of  $2 \text{ A g}^{-1}$ ; c) Specific capacitance at different current densities; d) Nyquist plots.
